# Supplementary material for: Development of an Accurate Polymerase Chain Reaction (PCR) Assay for Genetic Sex Identification in Lumpfish (Cyclopterus lumpus) Based on Male-Specific Anti-Mullerian Hormone (amh) Gene
Source: MDPI journal article supplement (doi:10.3390/fishes8060327), 2023-06-19
Supplement: s1 [file s1]

**Table S1.** Detailed record of the lumpfish (*Cyclopterus lumpus*) samples in this study. Including the sample ID, phenotypic sex, sampled location, family (if known), and the amplification result of each primer set. The “+” indicates the presence of the anticipated band, and “-” indicates the absence of the anticipated band

| Sample ID | Sex    | Original Region | Family | AMH1_E3I6<br>(presence/absence) | AMH2_I6E4<br>(presence/absence) | AMH1+3_E6I6<br>(no. of band) |
|-----------|--------|-----------------|--------|---------------------------------|---------------------------------|------------------------------|
| B1M       | Male   | British Isles   | N/A    | +                               | +                               | 2                            |
| B2M       | Male   | British Isles   | N/A    | +                               | +                               | 2                            |
| B3M       | Male   | British Isles   | N/A    | +                               | +                               | 2                            |
| B4M       | Male   | British Isles   | N/A    | +                               | +                               | 2                            |
| B5M       | Male   | British Isles   | N/A    | +                               | +                               | 2                            |
| B6M       | Male   | British Isles   | N/A    | +                               | +                               | 2                            |
| B7M       | Male   | British Isles   | N/A    | +                               | +                               | 2                            |
| B8M       | Male   | British Isles   | N/A    | +                               | +                               | 2                            |
| B9M       | Male   | British Isles   | N/A    | +                               | +                               | 2                            |
| B10M      | Male   | British Isles   | N/A    | +                               | +                               | 2                            |
| B11M      | Male   | British Isles   | N/A    | +                               | +                               | 2                            |
| B12M      | Male   | British Isles   | N/A    | +                               | +                               | 2                            |
| B13M      | Male   | British Isles   | N/A    | +                               | +                               | 2                            |
| B1F       | Female | British Isles   | N/A    | -                               | -                               | 1                            |
| B2F       | Female | British Isles   | N/A    | -                               | -                               | 1                            |
| B3F       | Female | British Isles   | N/A    | -                               | -                               | 1                            |
| B4F       | Female | British Isles   | N/A    | -                               | -                               | 1                            |
| B5F       | Female | British Isles   | N/A    | -                               | -                               | 1                            |
| B6F       | Female | British Isles   | N/A    | -                               | -                               | 1                            |
| B7F       | Female | British Isles   | N/A    | -                               | -                               | 1                            |
| B8F       | Female | British Isles   | N/A    | -                               | -                               | 1                            |
| B9F       | Female | British Isles   | N/A    | -                               | -                               | 1                            |
| B10F      | Female | British Isles   | N/A    | -                               | -                               | 1                            |
| B11F      | Female | British Isles   | N/A    | -                               | -                               | 1                            |
| B12F      | Female | British Isles   | N/A    | -                               | -                               | 1                            |
| B13F      | Female | British Isles   | N/A    | -                               | -                               | 1                            |
| B14F      | Female | British Isles   | N/A    | -                               | -                               | 1                            |
| B15F      | Female | British Isles   | N/A    | -                               | -                               | 1                            |

|      |        |               |     |   |   |   |
|------|--------|---------------|-----|---|---|---|
| B16F | Female | British Isles | N/A | — | — | 1 |
| B17F | Female | British Isles | N/A | — | — | 1 |
| B18F | Female | British Isles | N/A | — | — | 1 |
| B19F | Female | British Isles | N/A | — | — | 1 |
| B20F | Female | British Isles | N/A | — | — | 1 |
| B21F | Female | British Isles | N/A | — | — | 1 |
| B22F | Female | British Isles | N/A | — | — | 1 |
| B23F | Female | British Isles | N/A | — | — | 1 |
| B24F | Female | British Isles | N/A | — | — | 1 |
| B25F | Female | British Isles | N/A | — | — | 1 |
| B26F | Female | British Isles | N/A | — | — | 1 |
| B27F | Female | British Isles | N/A | — | — | 1 |
| B28F | Female | British Isles | N/A | — | — | 1 |
| B29F | Female | British Isles | N/A | — | — | 1 |
| B30F | Female | British Isles | N/A | — | — | 1 |
| B31F | Female | British Isles | N/A | — | — | 1 |
| B32F | Female | British Isles | N/A | — | — | 1 |
| B33F | Female | British Isles | N/A | — | — | 1 |
| B34F | Female | British Isles | N/A | — | — | 1 |
| I1M  | Male   | Iceland       | N/A | + | + | 2 |
| I2M  | Male   | Iceland       | N/A | + | + | 2 |
| I3M  | Male   | Iceland       | N/A | + | + | 2 |
| I4M  | Male   | Iceland       | N/A | + | + | 2 |
| I5M  | Male   | Iceland       | N/A | + | + | 2 |
| I6M  | Male   | Iceland       | N/A | + | + | 2 |
| I7M  | Male   | Iceland       | N/A | + | + | 2 |
| I8M  | Male   | Iceland       | N/A | + | + | 2 |
| I9M  | Male   | Iceland       | N/A | + | + | 2 |
| I10M | Male   | Iceland       | N/A | + | + | 2 |
| I11M | Male   | Iceland       | N/A | + | + | 2 |
| I12M | Male   | Iceland       | N/A | + | + | 2 |
| I13M | Male   | Iceland       | N/A | + | + | 2 |

|      |        |         |          |   |   |   |
|------|--------|---------|----------|---|---|---|
| I14M | Male   | Iceland | N/A      | + | + | 2 |
| I15M | Male   | Iceland | N/A      | + | + | 2 |
| I16M | Male   | Iceland | N/A      | + | + | 2 |
| I17M | Male   | Iceland | N/A      | + | + | 2 |
| I18M | Male   | Iceland | N/A      | + | + | 2 |
| I19M | Male   | Iceland | N/A      | + | + | 2 |
| I20M | Male   | Iceland | N/A      | + | + | 2 |
| I21M | Male   | Iceland | N/A      | + | + | 2 |
| I22M | Male   | Iceland | N/A      | + | + | 2 |
| I1F  | Female | Iceland | N/A      | – | – | 1 |
| I2F  | Female | Iceland | N/A      | – | – | 1 |
| I3F  | Female | Iceland | N/A      | – | – | 1 |
| I4F  | Female | Iceland | N/A      | – | – | 1 |
| I5F  | Female | Iceland | N/A      | – | – | 1 |
| I6F  | Female | Iceland | N/A      | – | – | 1 |
| I7F  | Female | Iceland | N/A      | – | – | 1 |
| I8F  | Female | Iceland | N/A      | – | – | 1 |
| I9F  | Female | Iceland | N/A      | – | – | 1 |
| I10F | Female | Iceland | N/A      | – | – | 1 |
| I11F | Female | Iceland | N/A      | – | – | 1 |
| I12F | Female | Iceland | N/A      | – | – | 1 |
| I13F | Female | Iceland | N/A      | – | – | 1 |
| I14F | Female | Iceland | N/A      | – | – | 1 |
| I15F | Female | Iceland | N/A      | – | – | 1 |
| I16F | Female | Iceland | N/A      | – | – | 1 |
| I17F | Female | Iceland | N/A      | – | – | 1 |
| N1M  | Male   | Norway  | Family 1 | + | + | 2 |
| N2M  | Male   | Norway  | Family 1 | + | + | 2 |
| N3M  | Male   | Norway  | Family 1 | + | + | 2 |
| N4M  | Male   | Norway  | Family 1 | + | + | 2 |
| N5M  | Male   | Norway  | Family 1 | + | + | 2 |
| N6M  | Male   | Norway  | Family 1 | + | + | 2 |

|      |        |        |          |   |   |   |
|------|--------|--------|----------|---|---|---|
| N7M  | Male   | Norway | Family 1 | + | + | 2 |
| N8M  | Male   | Norway | Family 1 | + | + | 2 |
| N9M  | Male   | Norway | Family 2 | − | − | 1 |
| N10M | Male   | Norway | Family 2 | + | + | 2 |
| N11M | Male   | Norway | Family 2 | + | + | 2 |
| N12M | Male   | Norway | Family 2 | + | + | 2 |
| N13M | Male   | Norway | Family 2 | + | + | 2 |
| N14M | Male   | Norway | Family 2 | + | + | 2 |
| N15M | Male   | Norway | Family 2 | + | + | 2 |
| N16M | Male   | Norway | Family 2 | + | + | 2 |
| N17M | Male   | Norway | Family 2 | + | + | 2 |
| N18M | Male   | Norway | Family 2 | + | + | 2 |
| N19M | Male   | Norway | Family 3 | − | − | 1 |
| N20M | Male   | Norway | Family 3 | + | + | 2 |
| N21M | Male   | Norway | Family 3 | + | + | 2 |
| N22M | Male   | Norway | Family 3 | + | + | 2 |
| N23M | Male   | Norway | Family 3 | + | + | 2 |
| N24M | Male   | Norway | Family 3 | + | + | 2 |
| N25M | Male   | Norway | Family 3 | + | + | 2 |
| N26M | Male   | Norway | Family 3 | + | + | 2 |
| N27M | Male   | Norway | Family 4 | + | + | 2 |
| N28M | Male   | Norway | Family 4 | + | + | 2 |
| N29M | Male   | Norway | Family 4 | + | + | 2 |
| N30M | Male   | Norway | Family 4 | + | + | 2 |
| N31M | Male   | Norway | Family 4 | + | + | 2 |
| N32M | Male   | Norway | Family 4 | + | + | 2 |
| N1F  | Female | Norway | Family 1 | − | − | 1 |
| N2F  | Female | Norway | Family 1 | − | − | 1 |
| N3F  | Female | Norway | Family 1 | − | − | 1 |
| N4F  | Female | Norway | Family 1 | − | − | 1 |
| N5F  | Female | Norway | Family 1 | − | − | 1 |
| N6F  | Female | Norway | Family 1 | − | − | 1 |

|      |        |        |          |   |   |   |
|------|--------|--------|----------|---|---|---|
| N7F  | Female | Norway | Family 2 | — | — | 1 |
| N8F  | Female | Norway | Family 2 | — | — | 1 |
| N9F  | Female | Norway | Family 2 | — | — | 1 |
| N10F | Female | Norway | Family 2 | — | — | 1 |
| N11F | Female | Norway | Family 2 | — | — | 1 |
| N12F | Female | Norway | Family 2 | — | — | 1 |
| N13F | Female | Norway | Family 3 | — | — | 1 |
| N14F | Female | Norway | Family 3 | — | — | 1 |
| N15F | Female | Norway | Family 3 | — | — | 1 |
| N16F | Female | Norway | Family 3 | — | — | 1 |
| N17F | Female | Norway | Family 3 | — | — | 1 |
| N18F | Female | Norway | Family 3 | — | — | 1 |
| N19F | Female | Norway | Family 4 | — | — | 1 |
| N20F | Female | Norway | Family 4 | — | — | 1 |
| N21F | Female | Norway | Family 4 | — | — | 1 |
| N22F | Female | Norway | Family 4 | — | — | 1 |
| N23F | Female | Norway | Family 4 | — | — | 1 |
| N24F | Female | Norway | Family 4 | — | — | 1 |
| N25F | Female | Norway | Family 4 | — | — | 1 |

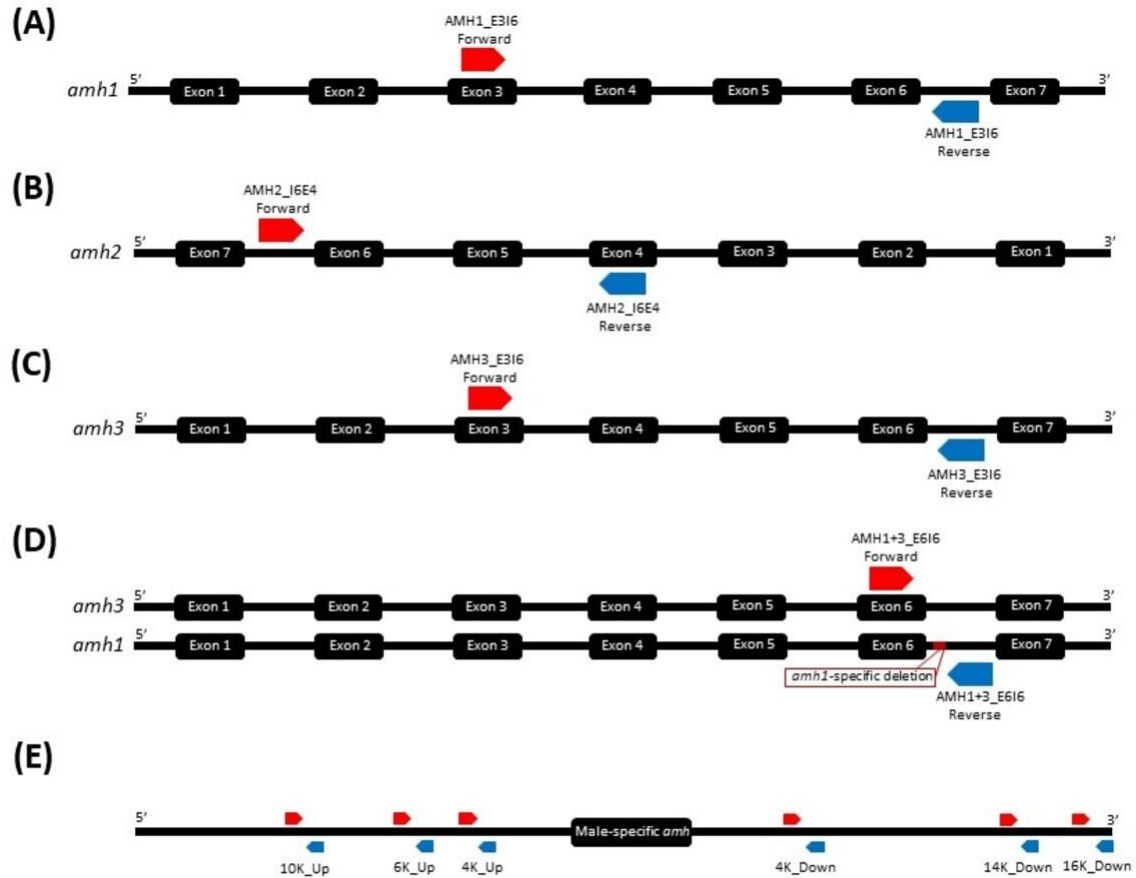

**Figure S1.** Binding sites of the primers utilised in this study to amplify *anti-Müllerian hormone (amh)* genes of lumpfish. Red pentagons represent forward primer. Blue pentagons represent reverse primers. (A) The expected binding sites of the primer set AMH1\_E3I6 on *amh1*. (B) The expected binding sites of the primer set AMH2\_I6E4 on *amh2*. (C) The expected binding sites of the primer set AMH3\_E3I6 on *amh3*. (D) The expected binding sites of the primer set AMH1+3\_E6I6 on the shared region of *amh1* and *amh3* which contain *amh1*-specific 91 bp deletion. (E) The expected binding sites of the primer set 4K\_Up, 6K\_Up, 10K\_Up, 4K\_Down, 14K\_Down, and 16K\_Down, which located adjacent to the male-specific *amh*.

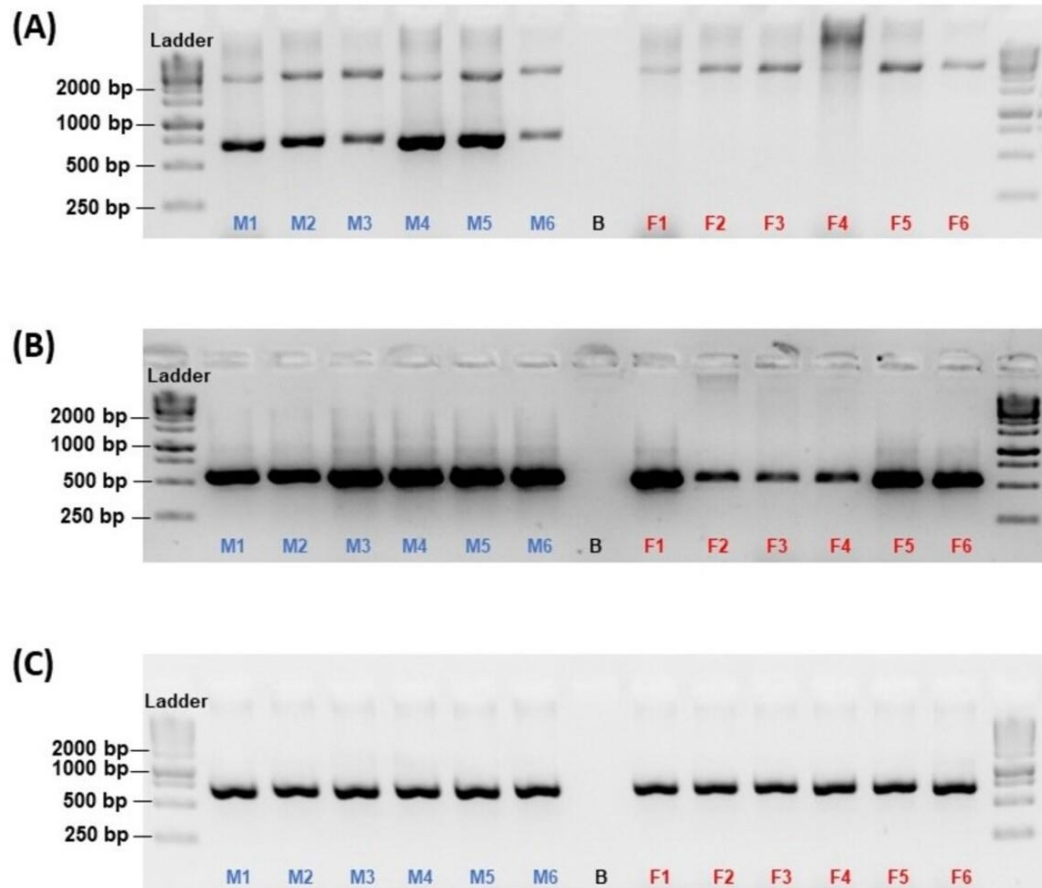

**Figure S2.** PCR amplification results of the primer set utilised for estimating the upstream coverage of the male-specific region in lumpfish. Lanes with blue labels represent the amplification results of the phenotypic males (M1-6); Lanes with red labels represent the amplification results of the phenotypic females (F1-6); Lanes with the “B” labels represent blanks as the negative control. (A) Results of primer set 4K\_Up. (B) Results of primer set 6K\_Up. (C) Results of primer set 10K\_Up. The ladder used is GeneRuler 1 kb DNA Ladder (Thermo Fisher Scientific, Waltham, Massachusetts, USA). The samples were run on ethidium bromide-stained 2.0 % agarose gel at 80 V for 30 min.

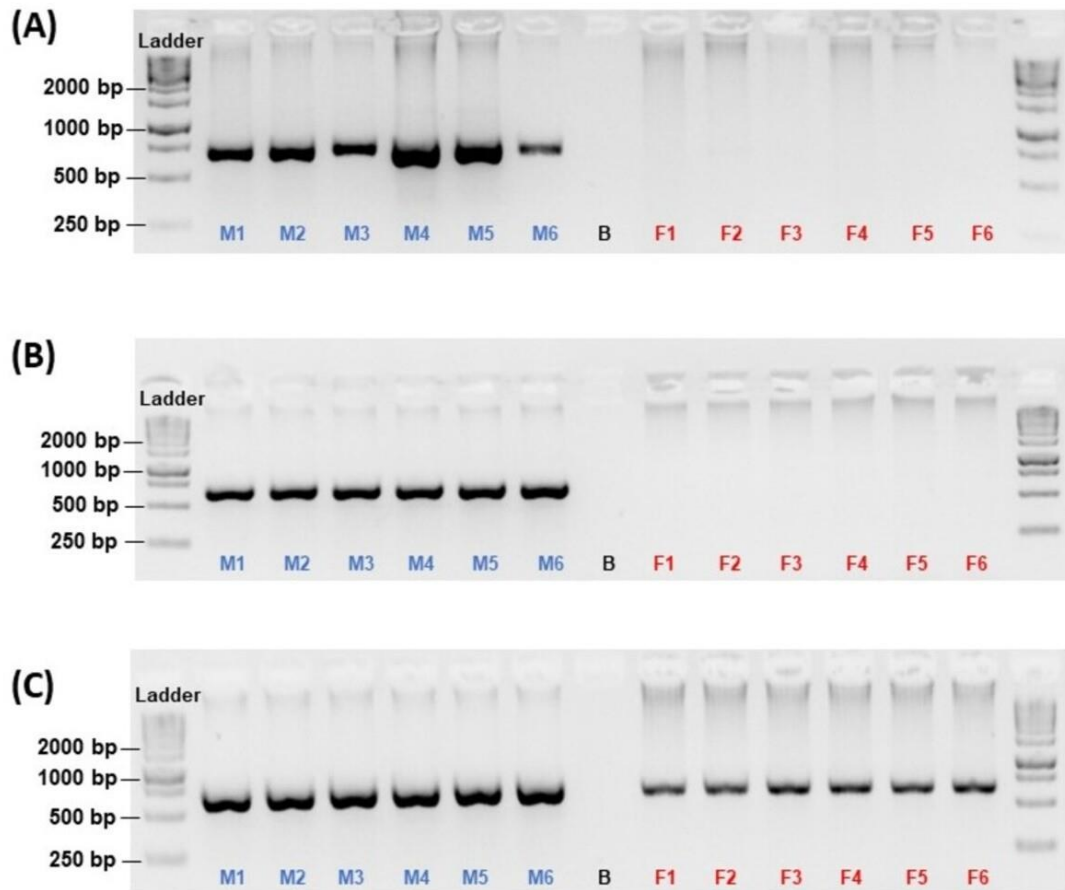

**Figure S3.** PCR amplification results of the primer set utilised for estimating the downstream coverage of the male-specific region in lumpfish. Lanes with blue labels represent the amplification results of the phenotypic males (M1-6); Lanes with red labels represent the amplification results of the phenotypic females (F1-6); Lanes with the “B” labels represent blanks as the negative control. (A) Results of primer set 4K\_Down (B) ) Results of primer set 14K\_Down (C) Results of primer set 16K\_Down. The ladder used is GeneRuler 1 kb DNA Ladder (Thermo Fisher Scientific, Waltham, Massachusetts, USA). The samples were run on ethidium bromide-stained 2.0 % agarose gel at 80 V for 30 min.
